# Supplementary material for: Investigation of novel indoline azo disperse dyes: synthesis, DFT simulation, and dyeing performance on PET and PA fabrics
Source: Royal Society of Chemistry journal article supplement (doi:10.1039/d3me00187c), 2024-01-01
Supplement: d3me00187c1.pdf [file d3me00187c1.pdf]

---

Supporting information

**Investigation of novel Indoline azo disperse dyes: synthesis, DFT simulation, and dyeing performance on PET and PA fabrics**

Xiyu Song, <sup>\*a</sup> Mingda Li, <sup>a</sup> Chuang Dai, <sup>a</sup> Jingyi Li, <sup>b</sup> Yu Wang, <sup>a</sup> Aiqin Hou<sup>b</sup> and  
Hongfei Qian<sup>a</sup>

a. *Key Laboratory of Clean Dyeing and Finishing Technology of Zhejiang Province,  
Shaoxing University, Shaoxing 312000, China*

b. *College of Chemistry and Chemical Engineering, Donghua University, Shanghai  
201620, P R China*

\* *Corresponding author. E-mail address: xiyusong@usx.edu.cn (Xiyu Song)*

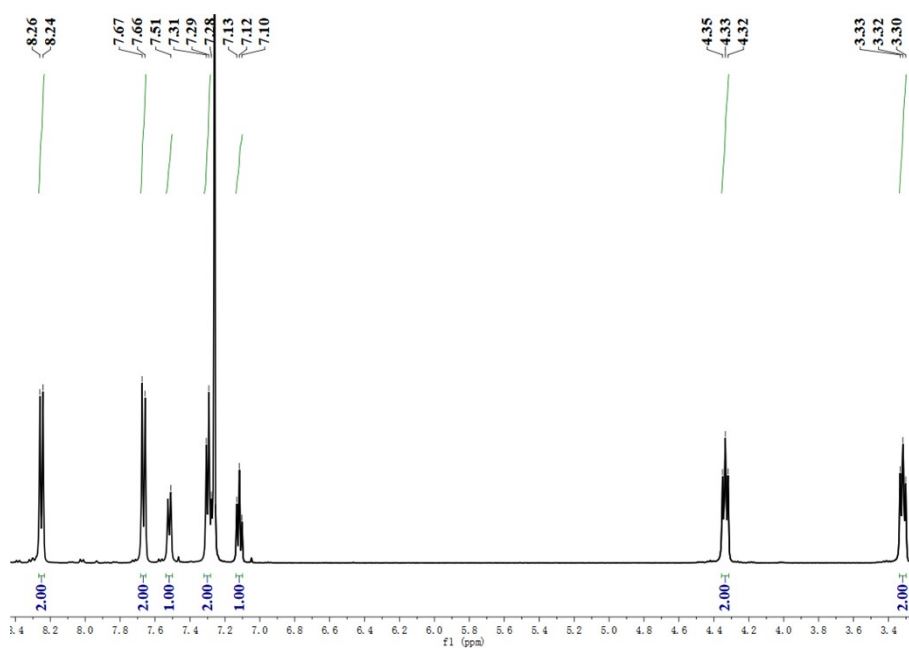Fig. S1. <sup>1</sup>H-NMR spectrum of D1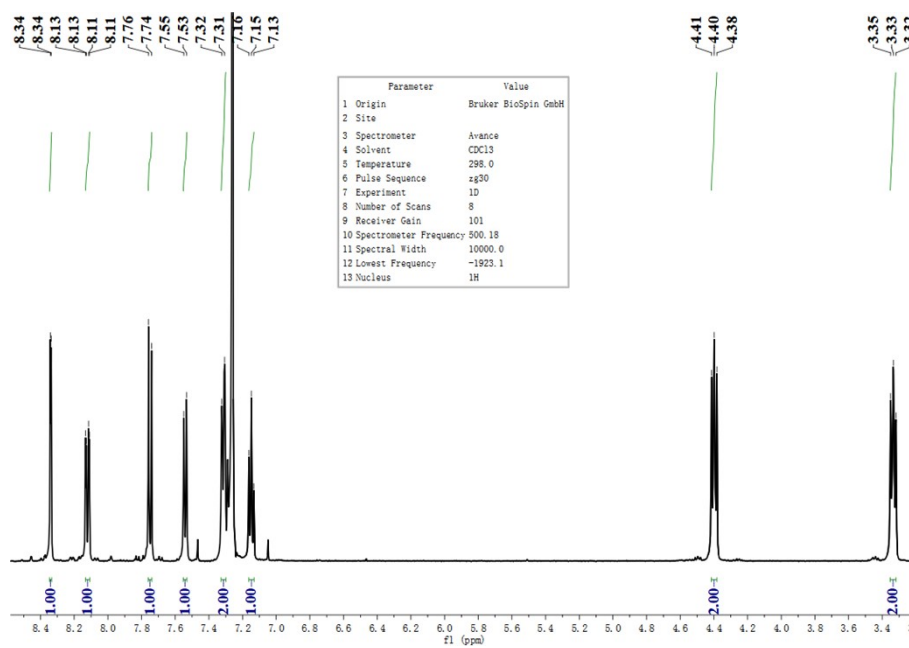Fig. S2. <sup>1</sup>H-NMR spectrum of D2

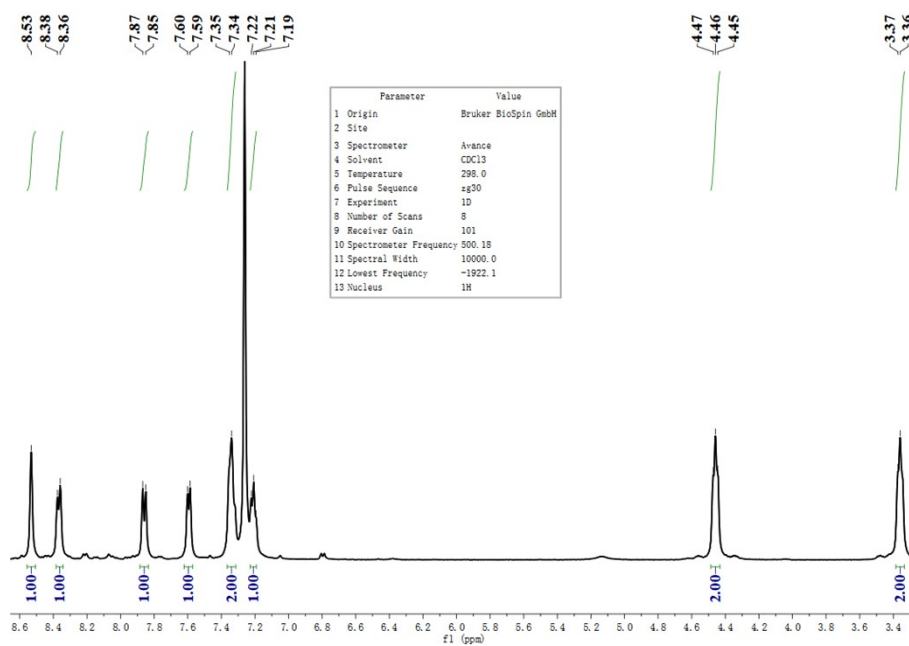Fig. S3.  $^1\text{H}$ -NMR spectrum of D3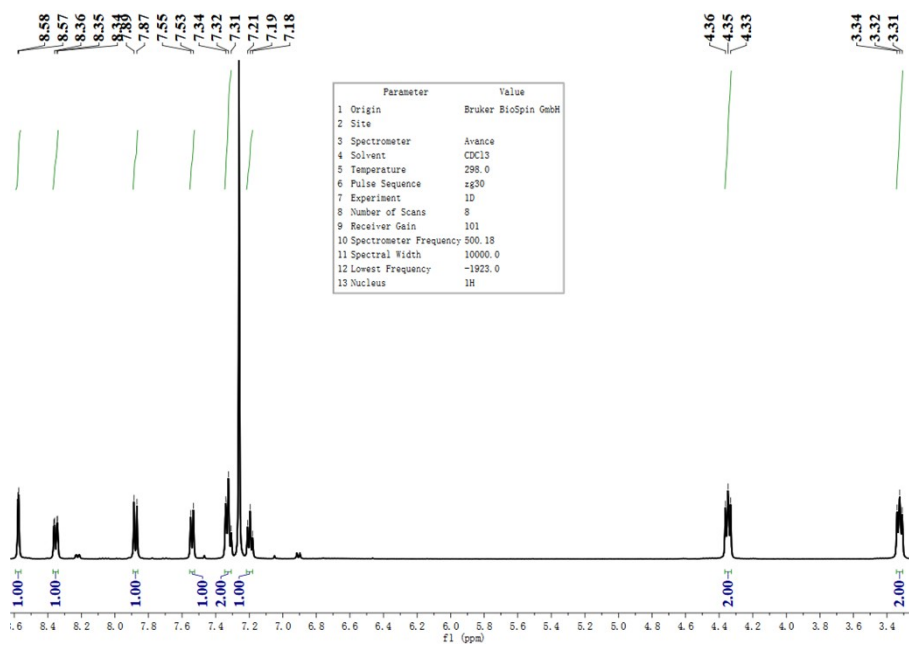Fig. S4.  $^1\text{H}$ -NMR spectrum of D4

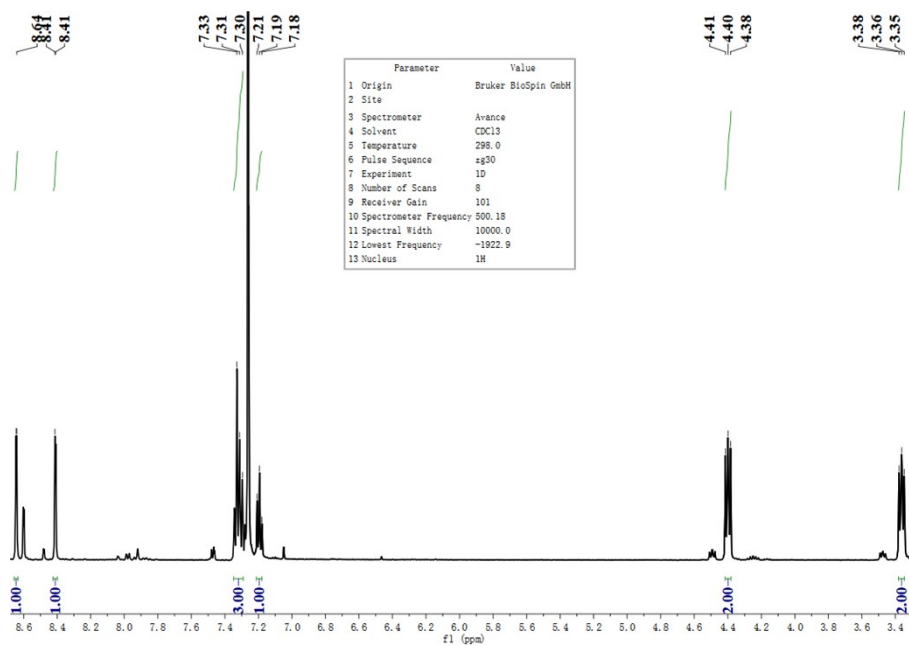Fig. S5. <sup>1</sup>H-NMR spectrum of D5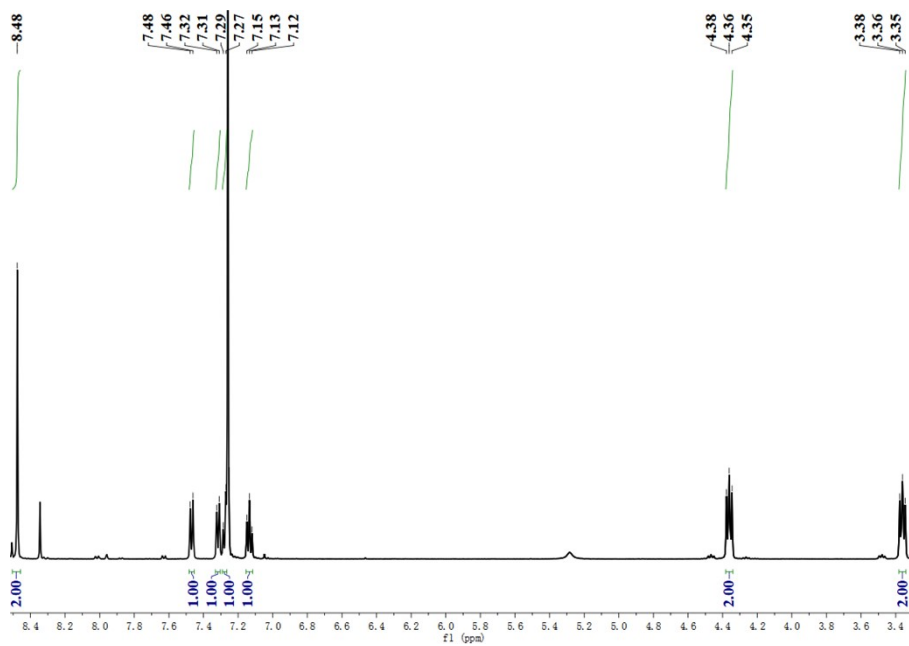Fig. S6. <sup>1</sup>H-NMR spectrum of D6

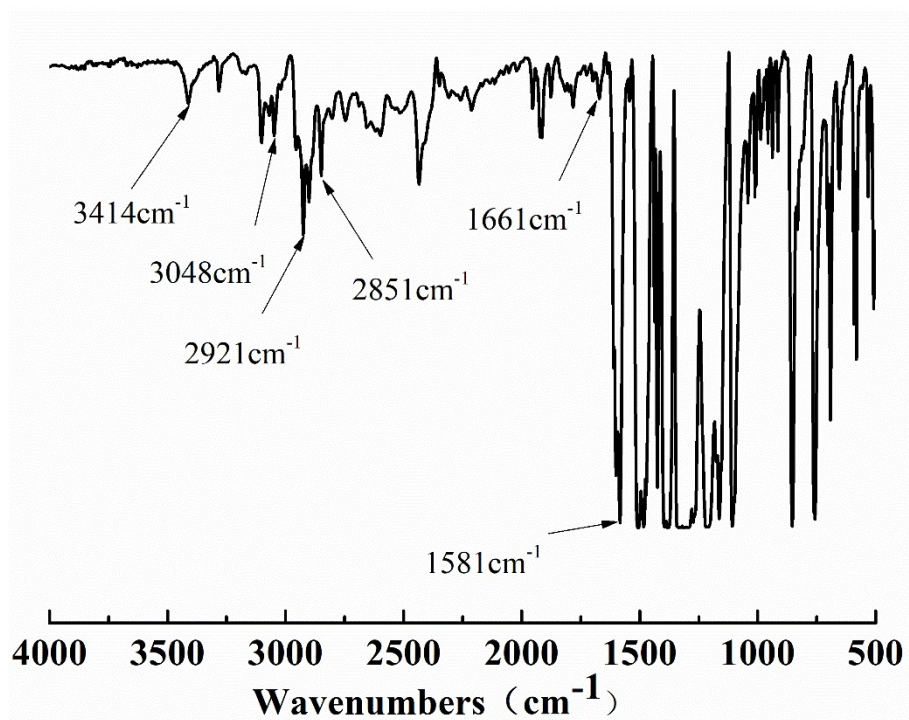

Fig. S7. FTIR spectrum of D1

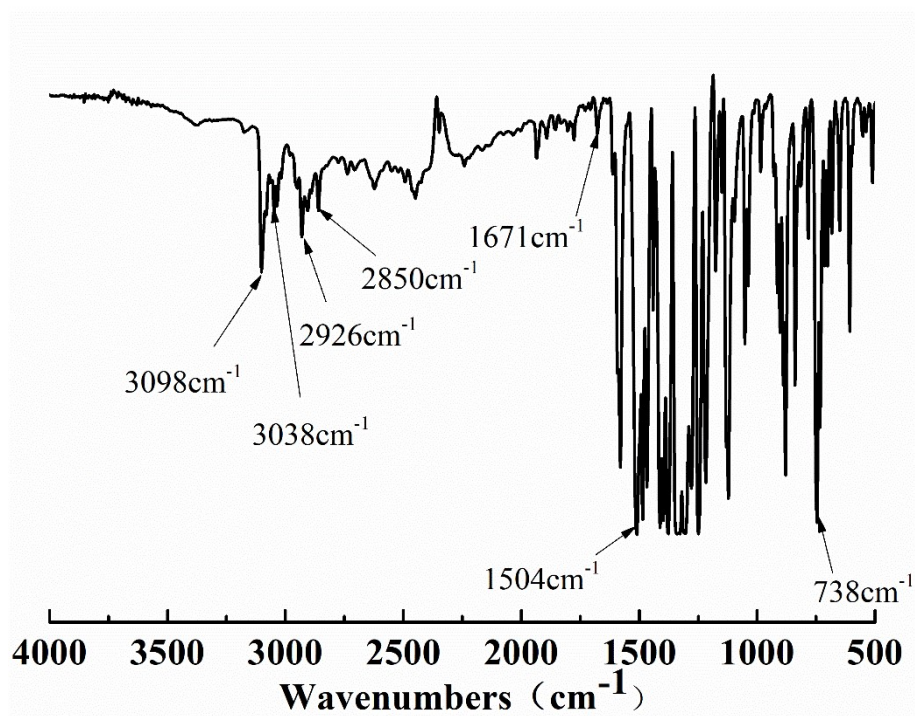

Fig. S8. FTIR spectrum of D2

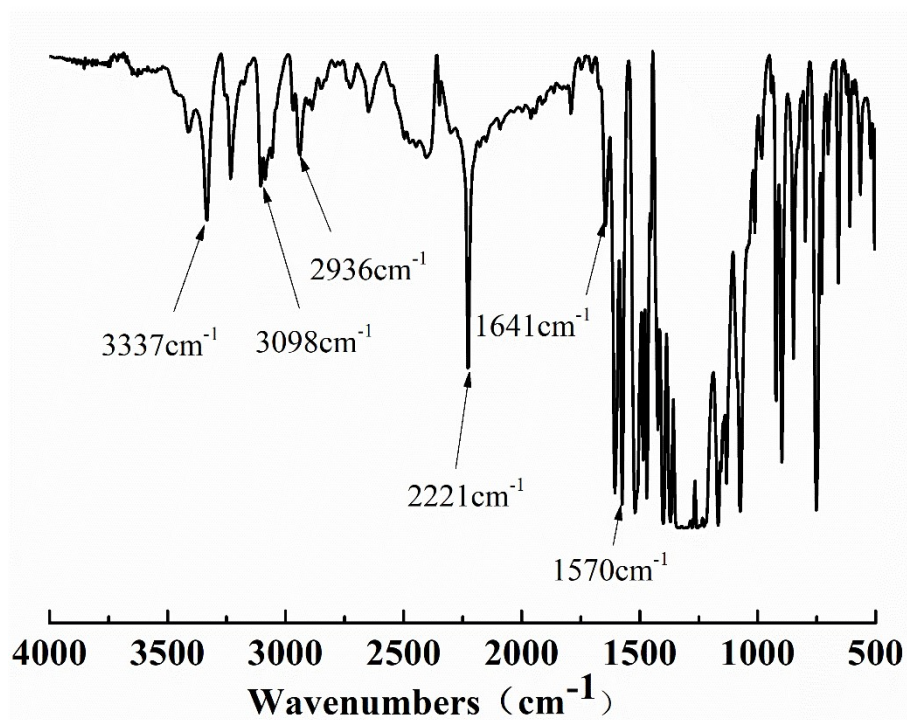

Fig. S9. FTIR spectrum of D3

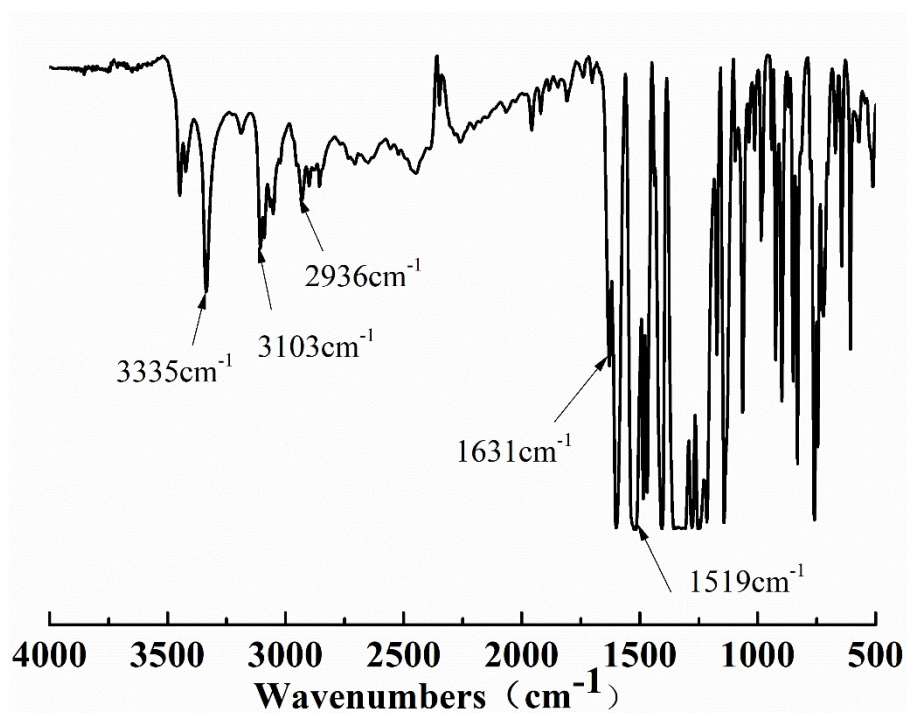

Fig. S10. FTIR spectrum of D4

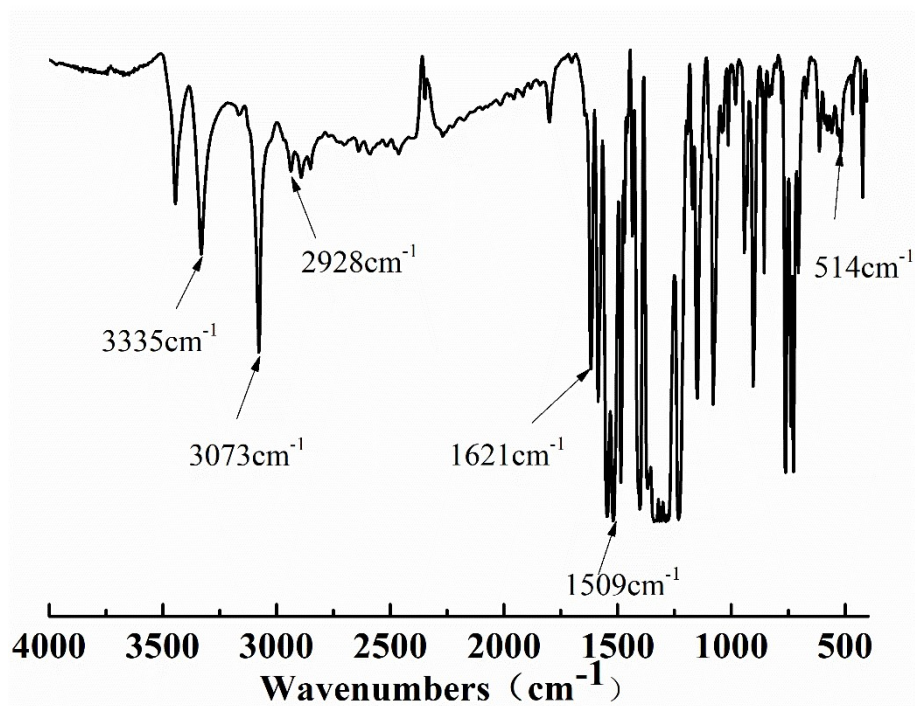

Fig. S11. FTIR spectrum of D5

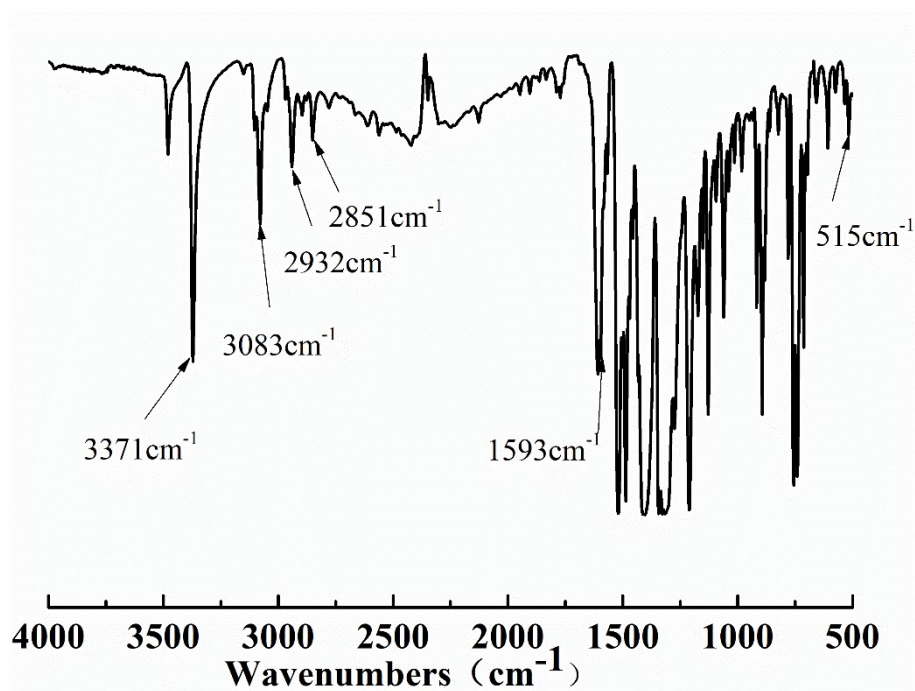

Fig. S12. FTIR spectrum of D6

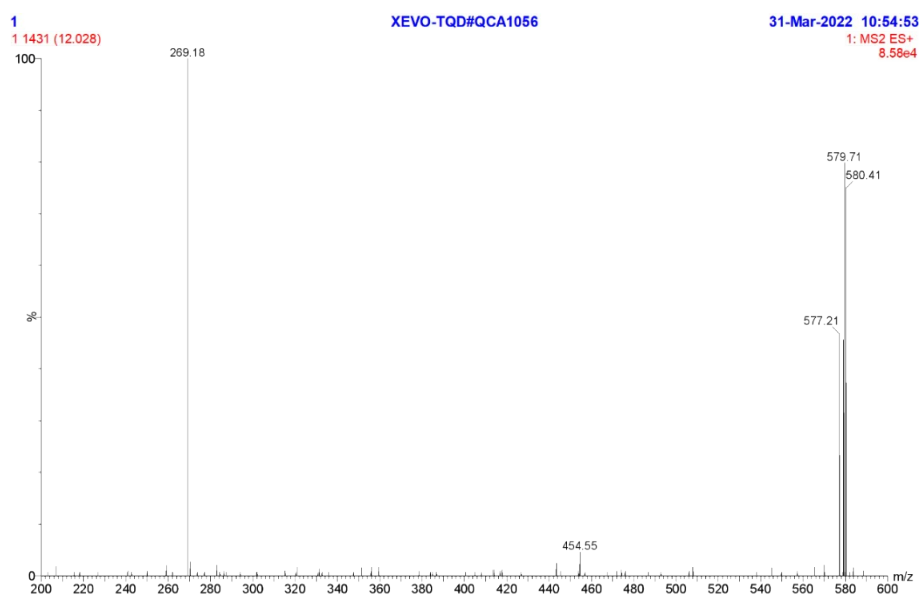

Fig. S13. MS spectrum of D1

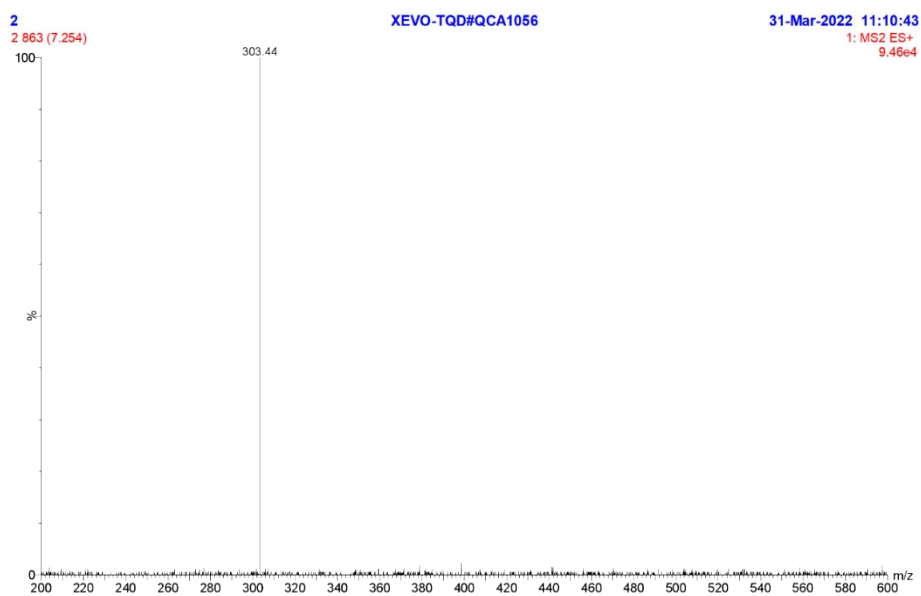

Fig. S14. MS spectrum of D2



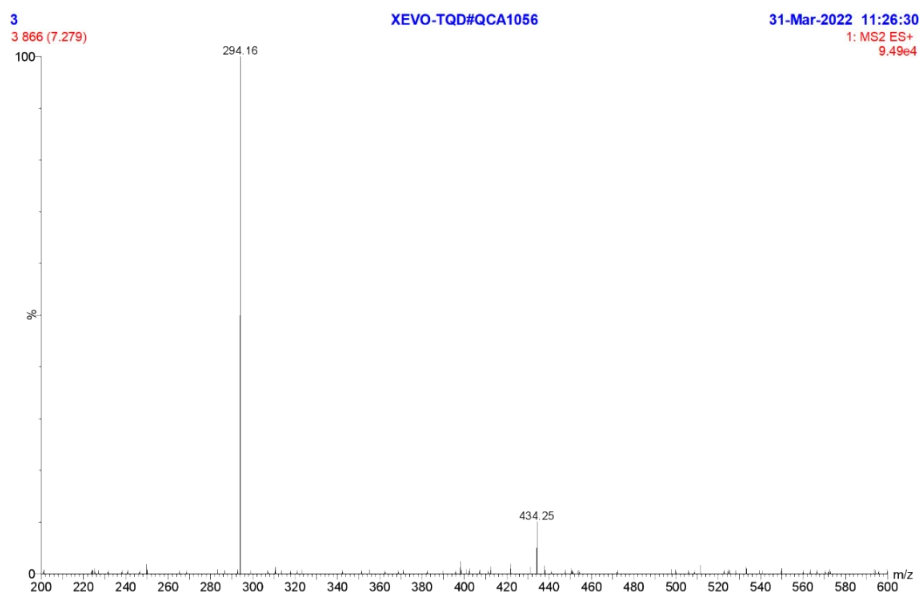

Fig. S15. MS spectrum of D3

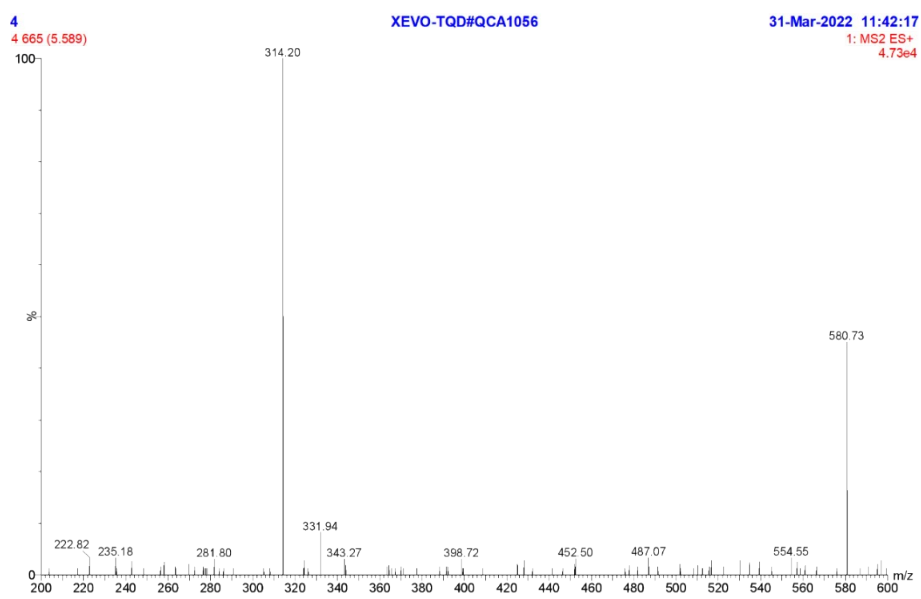

Fig. S16. MS spectrum of D4

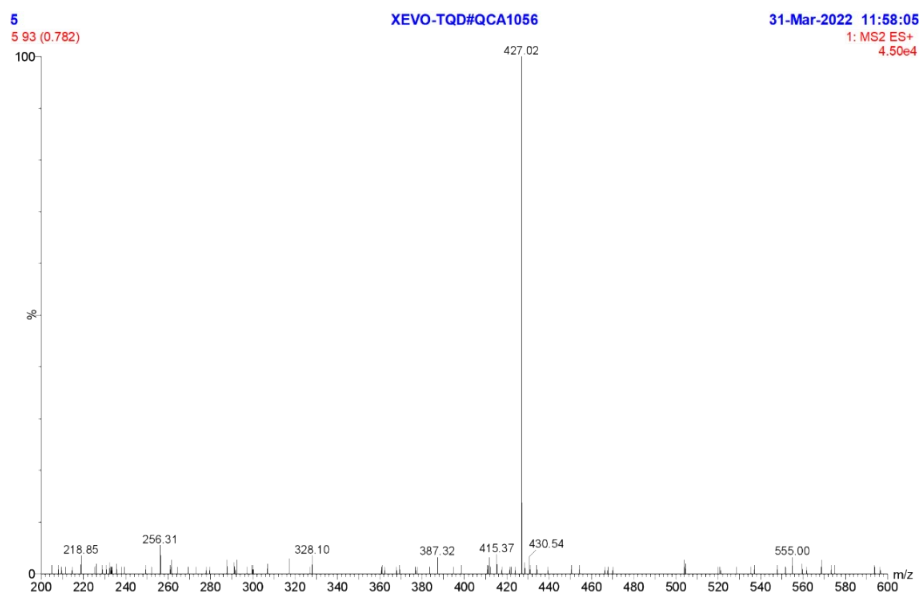

Fig. S17. MS spectrum of D5

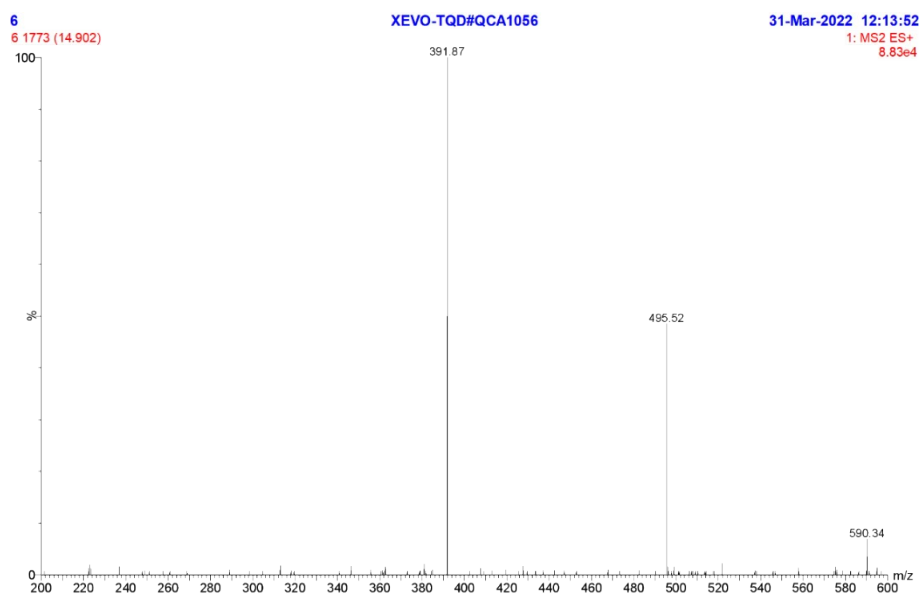

Fig. S18. MS spectrum of D6
